5

10

# **Preserving microsatellites? Conservation genetics of the giant Galápagos tortoise.**

15

Etienne Loire<sup>1</sup>, Nicolas Galtier<sup>2</sup>

20

25

<sup>1</sup> Centre de Coopération Internationale en Recherche Agronomique pour le Développement (CIRAD), UMR CMAEE and C2B, Montpellier (France)

<sup>2</sup> Institute of Evolutionary Sciences, University Montpellier, CNRS, IRD, EPHE (France)

30

**Data accessibility:** no new data was produced

## 35 **Abstract**

Conservation policy in the giant Galápagos tortoise, an iconic endangered animal, has been assisted by genetic markers for ~15 years: mitochondrial DNA and microsatellite loci have been used to delineate thirteen (sub)species, between which hybridization is prevented. Here, comparative  
40 reanalysis of a previously published NGS data set reveals a conflict with traditional markers. Genetic diversity and population substructure in the giant Galápagos tortoise are found to be particularly low, questioning the genetic relevance of current conservation practices.

45

Biological conservation implies collaboration between scientists, biodiversity managers and policy makers. We can only applaud when scientific progress influences policies and practices in a way that is beneficial to nature, and ultimately to humans. A recent Comment in Nature (Nichols 2015) highlights a spectacular conservation initiative geared towards an iconic endangered species – the giant Galápagos tortoise.

The Galápagos Islands host a number of fascinating endemic animals, such as Darwin's finches, Galápagos iguanas and Galápagos penguins and their preservation is clearly a major issue. These Islands are a paramount conservation priority. Remarkable efforts have been made by the Charles Darwin Research Station and the Galápagos National Park Service to protect indigenous species while eradicating invasive ones (e.g. Marquez et al. 2013). The Galapagos tortoise, *Chelonoidis nigra*, is probably the most emblematic of all species of the archipelago. These large tortoises have been heavily impacted by human activities over the centuries. Since the mid-1960s they have been the focus of a specific long-term conservation program, which has been fully successful in terms of population density recovery (e.g. Gibbs et al. 2014, Aguilera et al. 2015). The program mainly involved bringing eggs or adults from natural sites to rearing/breeding centers, and releasing in the field juveniles of sufficient size, thus escaping predation by rats (Cayot 2008).

Since the 2000's, population genetics research has been instrumental in the management plan of Galápagos tortoises. Thirteen giant Galápagos tortoise species (Poulakakis et al. 2015) have been described, or confirmed, using genetic data – specifically, mitochondrial DNA and 9-12 microsatellite loci (Caccone et al. 2002, Ciofi et al. 2002). Based on this information, population densities have been monitored in a way that aims at preserving, or even restoring, the integrity of the distinct gene pools (e.g. Milinkovitch et al. 2004, Garrick et al. 2012, Edwards et al. 2014). Milinkovitch et al. (2007), for instance, identified one "hybrid" individual among the thousands that had been repatriated to the Española island after captive breeding. This was removed from the field. Garrick et al. (2012) and Edwards et al. (2013) discuss the "conservation value" of individuals based on their genotypes. The most recent implementation of this strategy is an attempt to recreate the genome of the famous Lonesome George tortoise, the last member of the *C. (nigra) abingdoni* species, which died in 2012. The plan is to cross individuals from another species that carry *abingdoni* alleles – hence the recent transfer by helicopter and boat of 32 tortoises from their current habitat to the island of Santa Cruz (Nichols 2015).

80 Some problems, however, still hamper the task of defining *C. nigra* conservation units. For instance, mitochondrial DNA and microsatellite data do not fully agree (Poulakakis et al. 2012). Published levels of mitochondrial coding sequence divergence between named species of giant Galápagos tortoises (<1%, Caccone et al. 2004) are not higher than typical amounts of within-species mitochondrial polymorphism in reptiles (Bazin et al. 2006). Importantly, individuals  
85 carrying so-called ‘hybrid’ genotypes or unexpected mitochondrial haplotypes, given their geographic origin, are common in the field (e.g. Garrick et al. 2012). Because they are interpreted as being the result of non-natural causes (Russello et al. 2007, Poulakakis et al. 2008), such individuals have been removed from published analyses (Garrick et al. 2014, Poulakakis et al. 2015), thus artificially inflating measured levels of genetic differentiation between entities. In spite  
90 of this bias, estimated  $F_{ST}$  as low as 0.1 were considered sufficient to delineate species (Poulakakis et al. 2015), in absence of evidence for hybrid depression or local adaptation. Indeed, very little is known regarding the link between genetic variation, morphological variation and fitness in *C. nigra*. The conspicuous "saddleback" morphotype, for instance, is observed in several unrelated species that carry various combinations of mtDNA haplotypes and microsatellite alleles (e.g. Poulakakis et  
95 al 2012), and the heritability of this trait is so far unknown (Chiari et al. 2009).

Three years ago, we published the blood transcriptome of five giant Galápagos tortoises which, based on mtDNA and microsatellite data, were assigned to three distinct species – *becki*, *vandenburghi*, and *porteri* (Loire et al. 2013). To our surprise, our analysis of ~1000 coding loci did  
100 not reveal any evidence of genetic structure in this sample, i.e. the homozygosity of the five individuals was not higher than expected under the hypothesis that they belonged to a single panmictic population. We calculated the genetic distance between individuals, defined as the proportion of sites at which the two considered individuals carry distinct genotypes, and found no pattern related to current taxonomy, with for instance individual GA05H from species *becki* being  
105 closer to GA05E (*vandenburghi*, distance= $4.2 \cdot 10^{-4}$ ) than to GA05A (*becki*, distance= $8.9 \cdot 10^{-4}$ ). The total genetic variation detected in the sample was also quite low – heterozygosity was around 0.1%, consistent with earlier findings (Caccone et al. 2004).

Here we looked at the situation from a comparative standpoint and plotted the inbreeding  
110 coefficient  $F$  as a function of log-transformed synonymous diversity,  $\pi_s$ , in a dataset of 53 species of animals for which the transcriptome of at least four individuals sampled from different populations was available (Perry et al. 2014, Romiguier et al. 2014, Table S1). Inbreeding coefficient  $F$

measures the departure from Hardy-Weinberg equilibrium by comparing the expected and observed numbers of heterozygous genotypes, here summed across individuals and loci.  $F$  is expected to equal zero in absence of population structure, and to take positive values when individuals are more homozygous, on average, than expected under the assumption of panmixy. Data on all species in this dataset were analysed via the same procedure (Gayral et al. 2013, Ballenghien et al. 2017), thus ensuring optimal comparability between data points. Figure 1 indicates that *C. nigra* harbours lower genetic polymorphism and population structuring than most vertebrates or other animal species, which casts serious doubts on the existence of several differentiated gene pools in this taxon. Interestingly, the data point closest to *C. nigra* in this figure is *Homo sapiens* – a species in which very few people would argue the need to define (sub)species.

The above analysis is based on small samples – from 4 to 11 individuals per species – which in most cases precluded definition of sub-populations and calculation of the  $F_{ST}$  statistics – but note that a significantly positive  $F_{ST}$ , if any, should imply a significantly positive  $F$ , and that  $F$  in this analysis was calculated using the method of Weir and Cockerham (1984), which accounts for small sample size. Our analysis might be affected by, e.g., sequencing errors, genotyping errors, hidden paralogy, cross-contamination or other experimental artefacts (Ballenghien et al. 2017). To control for possible sources of noise and confirm that our approach has the power to identify strong genetic structure when it exists, we similarly analysed samples made of individuals from two congeneric species (Galtier 2016, Table S1). Distinctively high values of  $F$  were obtained with the two-species samples, compared to the single-species ones (Figure 1, open circles), casting further doubts on the hypothesis that our *C. nigra* sample comprises individuals from more than one species.

The sample of Loire et al. (2013) is small in terms of the number of individuals and obviously insufficient to provide a definitive answer regarding population genetic structure in *C. nigra*. Our sample, however, is large with regard to the number of loci. Roux et al. (2016) demonstrated the potential of the Romiguier et al. (2014) data set to inform on species boundary and the history of gene flow between populations. Our results, if confirmed, are highly relevant for the conservation of Galápagos tortoises. They could imply that the current practice whereby only individuals from the same "species" are crossed is not only pointless – in the absence of truly differentiated gene pools – but also potentially harmful to the species due to the risk of inbreeding depression. The risk is particularly high when large numbers of closely related individuals are simultaneously released in a closed area (Milinkovitch et al. 2004). In the same vein, physical removal from the field of naturally occurring 'hybrids' (Milinkovitch et al. 2007) and sterilization of individuals to avoid

undesired crosses (Hunter et al. 2013) might well actively participate in the decline in the mean fitness of local populations (Frankham et al. 2014).

150 Regretfully, even the most recent publications on this issue, including the description of a new species (Poulakakis et al. 2015), have overlooked the Loire et al. (2013) data and focused on the same limited set of markers developed some 15 years ago. It is odd that, nowadays in the genomic era, the conservation policy regarding Galápagos tortoises is based entirely on just a dozen loci, given the demonstrated potential of genome-wide data to enhance population genetics research in  
155 other groups of threatened animals (e.g. Liu et al. 2014, Moore et al. 2014, Der Sarkissian et al. 2015, Dobrynin et al. 2015, Lamichaney et al. 2015, Abascal et al. 2016). Given the importance of inbreeding depression as a threat to conservation of endangered species (e.g. Allendorf et al. 2010, Walling et al. 2011, Frankham 2015) and the existing doubts regarding the representativeness of datasets with small numbers of loci (Väli et al. 2008, DeFaveri et al. 2013), we suggest that forced  
160 inbreeding and sterilization interventions in Galápagos tortoises be delayed until the genetic architecture of the species are clarified via the analysis of genome-wide data in a sufficiently large sample, thus resolving the discrepancy between existing datasets.

There is some controversy and subjectivity in the definition of relevant conservation units and  
165 strategies (Edmands 2007, Funk et al. 2012, Shaffer et al. 2015). It is very likely that human intervention during the last centuries has not only dramatically affected *C. nigra* population density, but also favoured migration of individuals across islands. It is also quite likely, based on existing data, that gene flow between islands and/or local extinction/recolonization was substantial before human intervention, preventing speciation in *C. nigra* – otherwise hybrids would not be so  
170 common, total genetic diversity/divergence would be higher, population substructure would be stronger and more obviously correlated to morphology. In other words, *C. nigra* might well be better described as a perturbed metapopulation than a collection of endangered species. If this was true then the goal of resurrecting ancestral "lineages" would just be nonsense.

175 Only a genome-wide analysis has the power to discriminate between ancient and recent gene flow, clarify the link between genotype and phenotype, and inform conservation policies. Current management aims at preserving/restoring particular combinations of alleles at 12 specific loci; relevance to phenotypes, fitness, population history and species barriers in *C. nigra* is anything but clear.

180

# References

- Abascal F, Corvelo A, Cruz F, Villanueva-Cañas JL, Vlasova A, Marcet-Houben M, Martínez-Cruz  
185 B, Cheng JY, Prieto P, Quesada V, Quilez J, Li G, García F, Rubio-Camarillo M, Frias L, Ribeca  
P, Capella-Gutiérrez S, Rodríguez JM, Câmara F, Lowy E, Cozzuto L, Erb I, Tress ML,  
Rodríguez-Ales JL, Ruiz-Orera J, Reverter F, Casas-Marce M, Soriano L, Arango JR, Derdak S,  
Galán B, Blanc J, Gut M, Lorente-Galdos B, Andrés-Nieto M, López-Otín C, Valencia A, Gut I,  
García JL, Guigó R, Murphy WJ, Ruiz-Herrera A, Marques-Bonet T, Roma G, Notredame C,  
190 Mailund T, Albà MM, Gabaldón T, Alioto T, Godoy JA. 2016. Extreme genomic erosion after  
recurrent demographic bottlenecks in the highly endangered Iberian lynx. *Genome Biol* 17:251.  
Aguilera WT, Málaga J, Gibbs JP. 2015. Conservation: Giant tortoises hatch on Galapagos island.  
*Nature* 517:271.  
Allendorf FW, Hohenlohe PA, Luikart G. 2010. Genomics and the future of conservation genetics.  
195 *Nat Rev Genet* 11:697-709.  
Ballenghien M, Faivre N, Galtier N. 2017. Patterns of cross-contamination in a multi-species  
population genomic project: detection, quantification, impact, solutions. *BMC Biology* 15:25.  
Bazin E, Glémin S, Galtier N. 2006. Population size does not influence mitochondrial genetic  
diversity in animals. *Science* 312:570-572.  
200 Caccone A, Gentile G, Gibbs JP, Fritts TH, Snell HL, Betts J, Powell JR. 2002. Phylogeography  
and history of giant Galápagos tortoises. *Evolution* 56:2052-2066.  
Caccone A, Gentile G, Burns CE, Sezzi E, Bergman W, Ruelle M, Saltonstall K, Powell JR. 2004.  
Extreme difference in rate of mitochondrial and nuclear DNA evolution in a large ectotherm,  
Galápagos tortoises. *Mol Phylogenet Evol* 31:794-798.  
205 Cayot LJ. 2008. The restoration of giant tortoises and land iguana populations in Galápagos.  
*Galápagos Res* 65:39–43.  
Chiari Y, Hyseni C, Fritts TH, Glaberman S, Marquez C, Gibbs JP, Claude J, Caccone A. 2009.  
Morphometrics parallel genetics in a newly discovered and endangered taxon of Galápagos  
tortoise. *PLoS One* 4:e6272.  
210 Ciofi C, Milinkovitch MC, Gibbs JP, Caccone A, Powell JR. 2002. Microsatellite analysis of  
genetic divergence among populations of giant Galápagos tortoises. *Mol Ecol* 11:2265-2283.  
DeFaveri J, Viitaniemi H, Leder E, Merilä J. 2013. Characterizing genic and nongenic molecular  
markers: comparison of microsatellites and SNPs. *Mol Ecol Resour* 13:377-392.  
Der Sarkissian C, Ermini L, Schubert M, Yang MA, Librado P, Fumagalli M, Jónsson H, Bar-Gal

- 215 GK, Albrechtsen A, Vieira FG, Petersen B, Ginolhac A, Seguin-Orlando A, Magnussen K, Fages  
A, Gamba C, Lorente-Galdos B, Polani S, Steiner C, Neuditschko M, Jagannathan V, Feh C,  
Greenblatt CL, Ludwig A, Abramson NI, Zimmermann W, Schafberg R, Tikhonov A, Sicheritz-  
Ponten T, Willerslev E, Marques-Bonet T, Ryder OA, McCue M, Rieder S, Leeb T, Slatkin M,  
Orlando L. 2015. Evolutionary genomics and conservation of the endangered Przewalski's horse.  
220 Curr Biol 25:2577-2583.
- Dobrynin P, Liu S, Tamazian G, Xiong Z, Yurchenko AA, Krashenninnikova K, Kliver S, Schmidt-  
Küntzel A, Koepfli KP, Johnson W, Kuderna LF, García-Pérez R, Manuel Md, Godinez R,  
Komissarov A, Makunin A, Brukhin V, Qiu W, Zhou L, Li F, Yi J, Driscoll C, Antunes A,  
Oleksyk TK, Eizirik E, Perelman P, Roelke M, Wildt D, Diekhans M, Marques-Bonet T, Marker  
225 L, Bhak J, Wang J, Zhang G, O'Brien SJ. 2015. Genomic legacy of the African cheetah,  
*Acinonyx jubatus*. Genome Biol 16:277.
- Edmands S. 2007. Between a rock and a hard place: evaluating the relative risks of inbreeding and  
outbreeding for conservation and management. Mol Ecol 16:463-475.
- Edwards DL, Benavides E, Garrick RC, Gibbs JP, Russello MA, Dion KB, Hyseni C, Flanagan JP,  
230 Tapia W, Caccone A. 2013. The genetic legacy of Lonesome George survives: Giant tortoises  
with Pinta Island ancestry identified in Galápagos. Biol Cons 157:225-228.
- Edwards DL, Garrick RC, Tapia W, Caccone A. 2014. Cryptic structure and niche divergence  
within threatened Galápagos giant tortoises from southern Isabela Island. Conserv. Genet.  
15:1357–1369.
- 235 Frankham R, Bradshaw CJA, Brook BW. 2014. Genetics in conservation management: revised  
recommendations for the 50/500 rules, Red List criteria and population viability analyses. Biol  
Conserv 170:56-63.
- Frankham R. 2015. Genetic rescue of small inbred populations: meta-analysis reveals large and  
consistent benefits of gene flow. Mol Ecol 24:2610-2618.
- 240 Funk WC, McKay JK, Hohenlohe PA, Allendorf FW. 2012. Harnessing genomics for delineating  
conservation units. Trends Ecol Evol 27:489-496.
- Galtier N. 2016. Adaptive protein evolution in animals and the effective population size hypothesis.  
PLoS Genet 12:e1005774.
- Gayral P, Melo-Ferreira J, Glémin S, Bierne N, Carneiro M, Nabholz B, Lourenco JM, Alves PC,  
245 Ballenghien M, Faivre N, Belkhir K, Cahais V, Loire E, Bernard A, Galtier N. 2013. Reference-  
free population genomics from next-generation transcriptome data and the vertebrate-  
invertebrate gap. PLoS Genet 9:e1003457.
- Garrick RC, Benavides E, Russello MA, Hyseni C, Edwards DL, Gibbs JP, Tapia W, Ciofi C,



- Caccone A. 2014. Lineage fusion in Galápagos giant tortoises. *Mol Ecol* 23:5276-5290.
- 250 Gibbs JP, Hunter EA, Shoemaker KT, Tapia WH, Cayot LJ. 2014. Demographic outcomes and ecosystem implications of giant tortoise reintroduction to Española Island, Galapagos. *PLoS One* 9:e110742.
- Hunter EA, Gibbs JP, Cayot LJ, Tapia W. 2013. Equivalency of Galápagos giant tortoises used as ecological replacement species to restore ecosystem functions. *Conserv Biol* 27:701-709.
- 255 Lamichhaney S, Berglund J, Almén MS, Maqbool K, Grabherr M, Martinez-Barrio A, Promerová M, Rubin CJ, Wang C, Zamani N, Grant BR, Grant PR, Webster MT, Andersson L. 2015. Evolution of Darwin's finches and their beaks revealed by genome sequencing. *Nature* 518:371-375.
- Liu S, Lorenzen ED, Fumagalli M, Li B, Harris K, Xiong Z, Zhou L, Korneliussen TS, Somel M, 260 Babbitt C, Wray G, Li J, He W, Wang Z, Fu W, Xiang X, Morgan CC, Doherty A, O'Connell MJ, McInerney JO, Born EW, Dalén L, Dietz R, Orlando L, Sonne C, Zhang G, Nielsen R, Willerslev E, Wang J. 2014. Population genomics reveal recent speciation and rapid evolutionary adaptation in polar bears. *Cell* 157:785-794.
- Loire E, Chiari Y, Bernard A, Cahais V, Romiguier J, Nabholz B, Lourenço JM, Galtier N. 2013. 265 Population genomics of the endangered giant Galápagos tortoise. *Genome Biol* 14:R136.
- Marquez C, Gibbs JP, Carrion V, Naranjo S, Llerena A. 2013. Population response of Giant Galápagos Tortoises to feral goat removal. *Restoration Ecol* 2:181-185.
- Milinkovitch MC, Monteyne D, Gibbs JP, Fritts TH, Tapia W, Snell HL, Tiedemann R, Caccone A, Powell JR. 2004. Genetic analysis of a successful repatriation programme: giant Galápagos 270 tortoises. *Proc Biol Sci* 271:341-345.
- Milinkovitch MC, Monteyne D, Russello M, Gibbs JP, Snell HL, Tapia W, Marquez C, Caccone A, Powell JR. 2007. Giant Galápagos tortoises; molecular genetic analyses identify a trans-island hybrid in a repatriation program of an endangered taxon. *BMC Ecol* 7:2.
- Moore JS, Bourret V, Dionne M, Bradbury I, O'Reilly P, Kent M, Chaput G, Bernatchez L. 2014. 275 Conservation genomics of anadromous Atlantic salmon across its North American range: outlier loci identify the same patterns of population structure as neutral loci. *Mol Ecol* 23:5680-5697.
- Nichols H. 2015. Lonesome George 'look-alike' captured for tortoise-breeding effort. *Nature News* doi:10.1038/nature.2015.18955.
- Perry GH, Melsted P, Marioni JC, Wang Y, Bainer R, Pickrell JK, Michelini K, Zehr S, Yoder AD, 280 Stephens M, Pritchard JK, Gilad Y. 2012. Comparative RNA sequencing reveals substantial genetic variation in endangered primates. *Genome Res* 22:602-610.
- Poulakakis N, Glaberman S, Russello M, Beheregaray LB, Ciofi C, Powell JR, Caccone A. 2008.

Historical DNA analysis reveals living descendants of an extinct species of Galápagos tortoise.  
Proc Natl Acad Sci U S A 105:15464-15469.

- 285 Poulakakis N, Russello M, Geist D, Caccone A. 2012. Unravelling the peculiarities of island life: vicariance, dispersal and the diversification of the extinct and extant giant Galápagos tortoises. Mol Ecol 21:160-173.
- Poulakakis N, Edwards DL, Chiari Y, Garrick RC, Russello MA, Benavides E, Watkins-Colwell GJ, Glaberman S, Tapia W, Gibbs JP, Cayot LJ, Caccone A. 2015. Description of a new  
290 Galapagos giant tortoise species (*Chelonoidis*; Testudines: Testudinidae) from Cerro Fatal on Santa Cruz Island. PLoS One 10:e0138779.
- Romiguier J, Gayral P, Ballenghien M, Bernard A, Cahais V, Chenuil A, Chiari Y, Dernat R, Duret L, Faivre N, Loire E, Lourenco JM, Nabholz B, Roux C, Tsagkogeorga G, Weber AA, Weinert LA, Belkhir K, Bierne N, Glémin S, Galtier N. 2014. Comparative population genomics in  
295 animals uncovers the determinants of genetic diversity. Nature 515:261-263.
- Romiguier J, Fournier A, Yek SH, Keller L. 2017. Convergent evolution of social hybridogenesis in *Messor* harvester ants. Mol Ecol 26:1108-1117.
- Roux C, Fraïsse C, Romiguier J, Anciaux Y, Galtier N, Bierne N 2016. Shedding light on the grey zone of speciation along a continuum of genomic divergence. PLoS Biology 14:e2000234.
- 300 Russello MA, Beheregaray LB, Gibbs JP, Fritts T, Havill N, Powell JR, Caccone A. 2007. Lonesome George is not alone among Galápagos tortoises. Curr Biol 17:R317-318.
- Shafer AB, Wolf JB, Alves PC, Bergström L, Bruford MW, Brännström I, Colling G, Dalén L, De Meester L, Ekblom R, Fawcett KD, Fior S, Hajibabaei M, Hill JA, Hoezel AR, Höglund J, Jensen EL, Krause J, Kristensen TN, Krützen M, McKay JK, Norman AJ, Ogden R, Österling  
305 EM, Ouborg NJ, Piccolo J, Popović D, Primmer CR, Reed FA, Roumet M, Salmons J, Schenekar T, Schwartz MK, Segelbacher G, Senn H, Thaulow J, Valtonen M, Veale A, Vergeer P, Vijay N, Vilà C, Weissensteiner M, Wennerström L, Wheat CW, Zieliński P. Genomics and the challenging translation into conservation practice. Trends Ecol Evol 30:78-87.
- Väli U, Einarsson A, Waits L, Ellegren H. 2008. To what extent do microsatellite markers reflect  
310 genome-wide genetic diversity in natural populations? Mol Ecol 17:3808-3817.
- Walling CA, Nussey DH, Morris A, Clutton-Brock TH, Kruuk LE, Pemberton JM. 2011. Inbreeding depression in red deer calves. BMC Evol Biol 11:318.

315

# **Figure legend.**

## **Figure 1. Genetic diversity and population substructure in 53 species and 25 pairs of congeneric species of animals.**

320

Each filled circle corresponds to a single species of animals in which the transcriptome of at least four individuals was sequenced (Perry et al. 2012, Romiguier et al. 2014). Harvest ant *Messor barbarus* was excluded due to its highly specific mating system (Romiguier et al. 2017). Each open circle corresponds to a pair of congeneric species of animals in which the transcriptome of at least  
325 five individuals was sequenced (Galtier 2016). Genotypes were called using the improved, contamination-aware algorithm of Ballenghien et al. (2017), parameter  $\gamma$  being set to 0.2. X-axis (log scale) reflects the amount of neutral genetic variation within the sample. This is measured by the synonymous-site heterozygosity,  $\pi_s$ , for single species, and by the proportion of fixed synonymous differences for species pairs. Y-axis reflects the detected amount of population  
330 substructure, measured by the F statistics. The positions in the graph of *C. nigra*, *Homo sapiens* (single species) and of the *C. nigra/Chelonoidis carbonaria* pair are indicated by thumbnails.

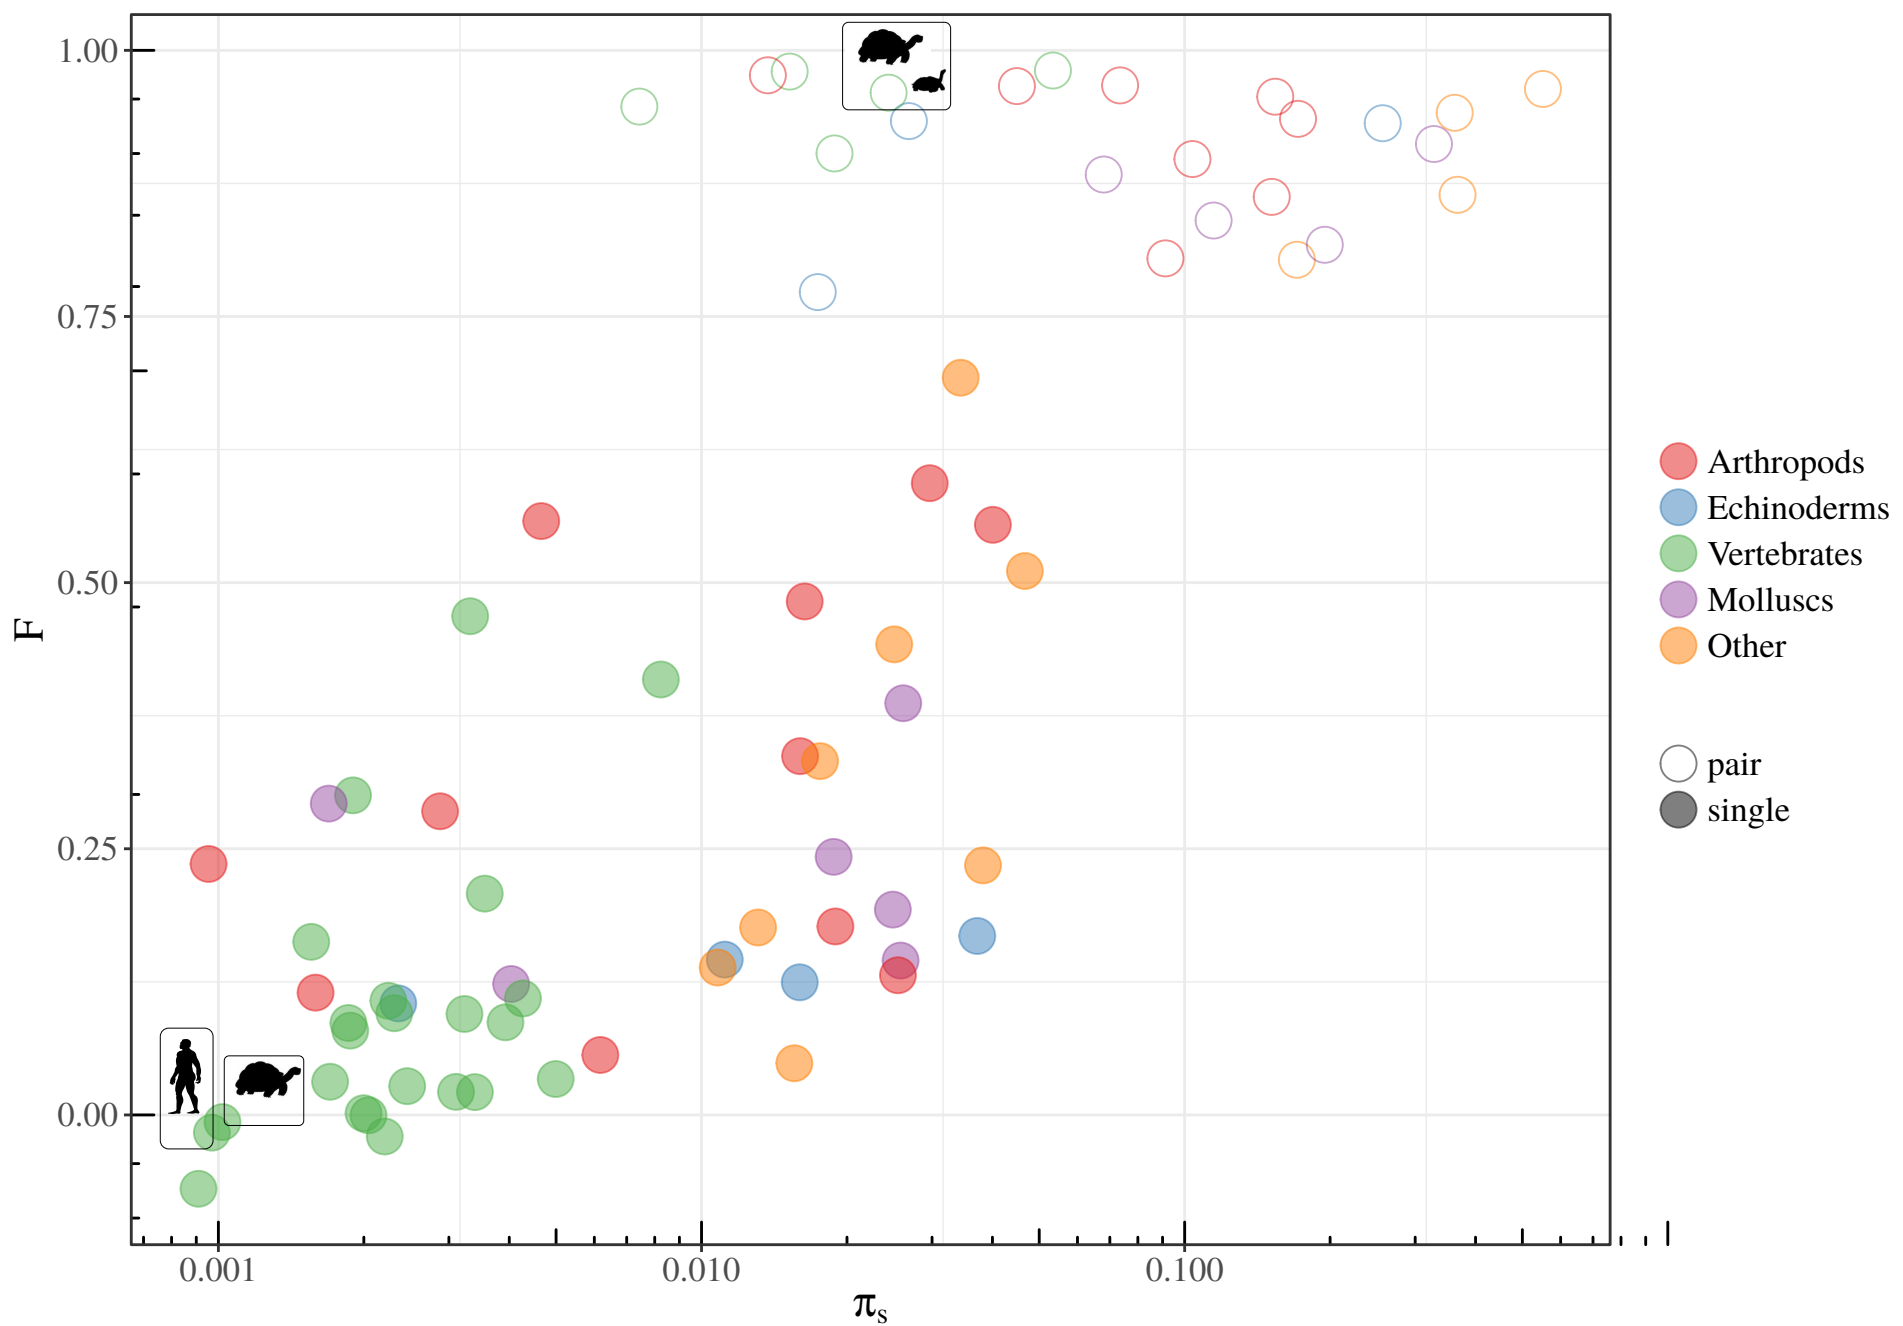

Source: http://biorxiv.org/content/10.1101/101980v2.full.pdf
